# Supplementary material for: Isolated Carbon(I) Species Featuring a Carbone Cation Radical
Source: Research Square preprint supplement (doi:10.21203/rs.3.rs-4666553/v1), 2024-07-10

## checkCIF/PLATON report

Structure factors have been supplied for datablock(s) i19025

THIS REPORT IS FOR GUIDANCE ONLY. IF USED AS PART OF A REVIEW PROCEDURE FOR PUBLICATION, IT SHOULD NOT REPLACE THE EXPERTISE OF AN EXPERIENCED CRYSTALLOGRAPHIC REFEREE.

No syntax errors found.      CIF dictionary      Interpreting this report

### Datablock: i19025

---

Bond precision:      C-C = 0.0050 A

Wavelength=0.71073

Cell:                      a=11.5473(5)                      b=11.6164(7)                      c=15.7781(9)  
                              alpha=77.205(3)                      beta=76.299(3)                      gamma=65.367(3)  
Temperature:              100 K

|                        | Calculated                   | Reported                    |
|------------------------|------------------------------|-----------------------------|
| Volume                 | 1850.96(18)                  | 1850.96(18)                 |
| Space group            | P -1                         | P -1                        |
| Hall group             | -P 1                         | -P 1                        |
| Moiety formula         | 2(C29 H32 N6 O4), 5(C4 H8 O) | C29 H32 N6 O4, 2.5(C4 H8 O) |
| Sum formula            | C78 H104 N12 O13             | C39 H52 N6 O6.50            |
| Mr                     | 1417.73                      | 708.86                      |
| Dx, g cm <sup>-3</sup> | 1.272                        | 1.272                       |
| Z                      | 1                            | 2                           |
| Mu (mm <sup>-1</sup> ) | 0.088                        | 0.088                       |
| F000                   | 760.0                        | 760.0                       |
| F000'                  | 760.33                       |                             |
| h,k,lmax               | 13,13,18                     | 13,13,18                    |
| Nref                   | 6520                         | 6516                        |
| Tmin,Tmax              | 0.992,0.996                  | 0.803,0.970                 |
| Tmin'                  | 0.989                        |                             |

Correction method= # Reported T Limits: Tmin=0.803 Tmax=0.970  
AbsCorr = MULTI-SCAN

Data completeness= 0.999

Theta(max)= 25.000

R(reflections)= 0.0640( 4202)

wR2(reflections)=  
0.1882( 6516)

S = 1.034

Npar= 586

---

The following ALERTS were generated. Each ALERT has the format

**test-name\_ALERT\_alert-type\_alert-level.**

Click on the hyperlinks for more details of the test.

---

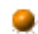

#### Alert level B

RINTA01\_ALERT\_3\_B The value of Rint is greater than 0.18  
Rint given 0.206

**Author Response: This compound consistently deposits as multiple crystals that require sectioning prior to diffraction. The data herein represent the best of several trials.**

---

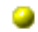

#### Alert level C

|                   |                                                 |              |
|-------------------|-------------------------------------------------|--------------|
| PLAT042_ALERT_1_C | Calc. and Reported MoietyFormula Strings Differ | Please Check |
|                   | Calc: 2(C29 H32 N6 O4), 5(C4 H8 O)              |              |
|                   | Rep.: C29 H32 N6 O4, 2.5(C4 H8 O)               |              |
| PLAT214_ALERT_2_C | Atom C36A (Anion/Solvent) ADP max/min Ratio     | 4.9 oblate   |
| PLAT340_ALERT_3_C | Low Bond Precision on C-C Bonds .....           | 0.00504 Ang. |
| PLAT911_ALERT_3_C | Missing FCF Refl Between Thmin & STh/L= 0.595   | 3 Report     |
|                   | 0 1 1, -2 0 2, 2 1 2,                           |              |
| PLAT977_ALERT_2_C | Check Negative Difference Density on H37B .     | -0.33 eA-3   |

---

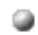

#### Alert level G

|                   |                                                  |               |
|-------------------|--------------------------------------------------|---------------|
| PLAT002_ALERT_2_G | Number of Distance or Angle Restraints on AtSite | 25 Note       |
| PLAT003_ALERT_2_G | Number of Uiso or U(i,j) Restrained non-H Atoms  | 25 Report     |
| PLAT020_ALERT_3_G | The Value of Rint is Greater Than 0.12 .....     | 0.206 Report  |
| PLAT045_ALERT_1_G | Calculated and Reported Z Differ by a Factor ... | 0.500 Check   |
| PLAT154_ALERT_1_G | The s.u.'s on the Cell Angles are Equal ..(Note) | 0.003 Degree  |
| PLAT176_ALERT_4_G | The CIF-Embedded .res File Contains SADI Records | 2 Report      |
| PLAT178_ALERT_4_G | The CIF-Embedded .res File Contains SIMU Records | 3 Report      |
| PLAT187_ALERT_4_G | The CIF-Embedded .res File Contains RIGU Records | 5 Report      |
| PLAT188_ALERT_3_G | A Non-default SIMU Restraint Value has been used | 0.0200 Report |
| PLAT188_ALERT_3_G | A Non-default SIMU Restraint Value has been used | 0.0200 Report |
| PLAT188_ALERT_3_G | A Non-default SIMU Restraint Value has been used | 0.0200 Report |
| PLAT300_ALERT_4_G | Atom Site Occupancy of O7 Constrained at         | 0.5 Check     |
| PLAT300_ALERT_4_G | Atom Site Occupancy of C38 Constrained at        | 0.5 Check     |
| PLAT300_ALERT_4_G | Atom Site Occupancy of C39 Constrained at        | 0.5 Check     |
| PLAT300_ALERT_4_G | Atom Site Occupancy of C40 Constrained at        | 0.5 Check     |
| PLAT300_ALERT_4_G | Atom Site Occupancy of C41 Constrained at        | 0.5 Check     |
| PLAT300_ALERT_4_G | Atom Site Occupancy of H38A Constrained at       | 0.5 Check     |
| PLAT300_ALERT_4_G | Atom Site Occupancy of H38B Constrained at       | 0.5 Check     |
| PLAT300_ALERT_4_G | Atom Site Occupancy of H39A Constrained at       | 0.5 Check     |
| PLAT300_ALERT_4_G | Atom Site Occupancy of H39B Constrained at       | 0.5 Check     |
| PLAT300_ALERT_4_G | Atom Site Occupancy of H40A Constrained at       | 0.5 Check     |
| PLAT300_ALERT_4_G | Atom Site Occupancy of H40B Constrained at       | 0.5 Check     |
| PLAT300_ALERT_4_G | Atom Site Occupancy of H41A Constrained at       | 0.5 Check     |
| PLAT300_ALERT_4_G | Atom Site Occupancy of H41B Constrained at       | 0.5 Check     |
| PLAT302_ALERT_4_G | Anion/Solvent/Minor-Residue Disorder (Resd 2)    | 100% Note     |
| PLAT302_ALERT_4_G | Anion/Solvent/Minor-Residue Disorder (Resd 3)    | 100% Note     |
| PLAT302_ALERT_4_G | Anion/Solvent/Minor-Residue Disorder (Resd 4)    | 100% Note     |

|                   |                                                            |          |       |        |
|-------------------|------------------------------------------------------------|----------|-------|--------|
| PLAT302_ALERT_4_G | Anion/Solvent/Minor-Residue Disorder                       | (Resd 5) | 100%  | Note   |
| PLAT302_ALERT_4_G | Anion/Solvent/Minor-Residue Disorder                       | (Resd 6) | 100%  | Note   |
| PLAT304_ALERT_4_G | Non-Integer Number of Atoms in .....                       | (Resd 2) | 7.96  | Check  |
| PLAT304_ALERT_4_G | Non-Integer Number of Atoms in .....                       | (Resd 3) | 8.45  | Check  |
| PLAT304_ALERT_4_G | Non-Integer Number of Atoms in .....                       | (Resd 4) | 6.50  | Check  |
| PLAT304_ALERT_4_G | Non-Integer Number of Atoms in .....                       | (Resd 5) | 5.04  | Check  |
| PLAT304_ALERT_4_G | Non-Integer Number of Atoms in .....                       | (Resd 6) | 4.55  | Check  |
| PLAT398_ALERT_2_G | Deviating C-O-C Angle From 120 for O5                      | .        | 109.0 | Degree |
| PLAT398_ALERT_2_G | Deviating C-O-C Angle From 120 for O6                      | .        | 108.0 | Degree |
| PLAT398_ALERT_2_G | Deviating C-O-C Angle From 120 for O7                      | .        | 109.9 | Degree |
| PLAT398_ALERT_2_G | Deviating C-O-C Angle From 120 for O5A                     | .        | 109.6 | Degree |
| PLAT411_ALERT_2_G | Short Inter H...H Contact H24 ..H37C                       | .        | 2.11  | Ang.   |
|                   | 1-x,1-y,1-z =                                              |          | 2_666 | Check  |
| PLAT413_ALERT_2_G | Short Inter XH3 .. XHn H22C ..H37D                         | .        | 2.11  | Ang.   |
|                   | 1-x,1-y,1-z =                                              |          | 2_666 | Check  |
| PLAT432_ALERT_2_G | Short Inter X...Y Contact C25 ..C37A                       | .        | 3.06  | Ang.   |
|                   | 1-x,1-y,1-z =                                              |          | 2_666 | Check  |
| PLAT789_ALERT_4_G | Atoms with Negative _atom_site_disorder_group #            |          | 13    | Check  |
| PLAT793_ALERT_4_G | Model has Chirality at C24 (Centro SpGr)                   |          | S     | Verify |
| PLAT822_ALERT_4_G | CIF-embedded .res Contains Negative PART Numbers           |          | 1     | Check  |
| PLAT860_ALERT_3_G | Number of Least-Squares Restraints .....                   |          | 642   | Note   |
| PLAT909_ALERT_3_G | Percentage of I>2sig(I) Data at Theta(Max) Still           |          | 35%   | Note   |
| PLAT910_ALERT_3_G | Missing # of FCF Reflection(s) Below Theta(Min).           |          | 1     | Note   |
|                   | 0 0 1,                                                     |          |       |        |
| PLAT913_ALERT_3_G | Missing # of Very Strong Reflections in FCF ....           |          | 2     | Note   |
|                   | -2 0 2, 2 1 2,                                             |          |       |        |
| PLAT933_ALERT_2_G | Number of HKL-OMIT Records in Embedded .res File           |          | 2     | Note   |
|                   | 2 1 2, -2 0 2,                                             |          |       |        |
| PLAT960_ALERT_3_G | Number of Intensities with I < - 2*sig(I) ...              |          | 4     | Check  |
| PLAT967_ALERT_5_G | Note: Two-Theta Cutoff Value in Embedded .res ..           |          | 50.0  | Degree |
| PLAT969_ALERT_5_G | The 'Henn et al.' R-Factor-gap value .....                 |          | 3.090 | Note   |
|                   | Predicted wR2: Based on SigI**2 6.09 or SHELX Weight 18.21 |          |       |        |
| PLAT978_ALERT_2_G | Number C-C Bonds with Positive Residual Density.           |          | 3     | Info   |

---

0 **ALERT level A** = Most likely a serious problem - resolve or explain  
 1 **ALERT level B** = A potentially serious problem, consider carefully  
 5 **ALERT level C** = Check. Ensure it is not caused by an omission or oversight  
 53 **ALERT level G** = General information/check it is not something unexpected

3 ALERT type 1 CIF construction/syntax error, inconsistent or missing data  
 13 ALERT type 2 Indicator that the structure model may be wrong or deficient  
 12 ALERT type 3 Indicator that the structure quality may be low  
 29 ALERT type 4 Improvement, methodology, query or suggestion  
 2 ALERT type 5 Informative message, check

---

It is advisable to attempt to resolve as many as possible of the alerts in all categories. Often the minor alerts point to easily fixed oversights, errors and omissions in your CIF or refinement strategy, so attention to these fine details can be worthwhile. In order to resolve some of the more serious problems it may be necessary to carry out additional measurements or structure refinements. However, the purpose of your study may justify the reported deviations and the more serious of these should normally be commented upon in the discussion or experimental section of a paper or in the "special\_details" fields of the CIF. checkCIF was carefully designed to identify outliers and unusual parameters, but every test has its limitations and alerts that are not important in a particular case may appear. Conversely, the absence of alerts does not guarantee there are no aspects of the results needing attention. It is up to the individual to critically assess their own results and, if necessary, seek expert advice.

### **Publication of your CIF in IUCr journals**

A basic structural check has been run on your CIF. These basic checks will be run on all CIFs submitted for publication in IUCr journals (*Acta Crystallographica*, *Journal of Applied Crystallography*, *Journal of Synchrotron Radiation*); however, if you intend to submit to *Acta Crystallographica Section C* or *E* or *IUCrData*, you should make sure that full publication checks are run on the final version of your CIF prior to submission.

### **Publication of your CIF in other journals**

Please refer to the *Notes for Authors* of the relevant journal for any special instructions relating to CIF submission.

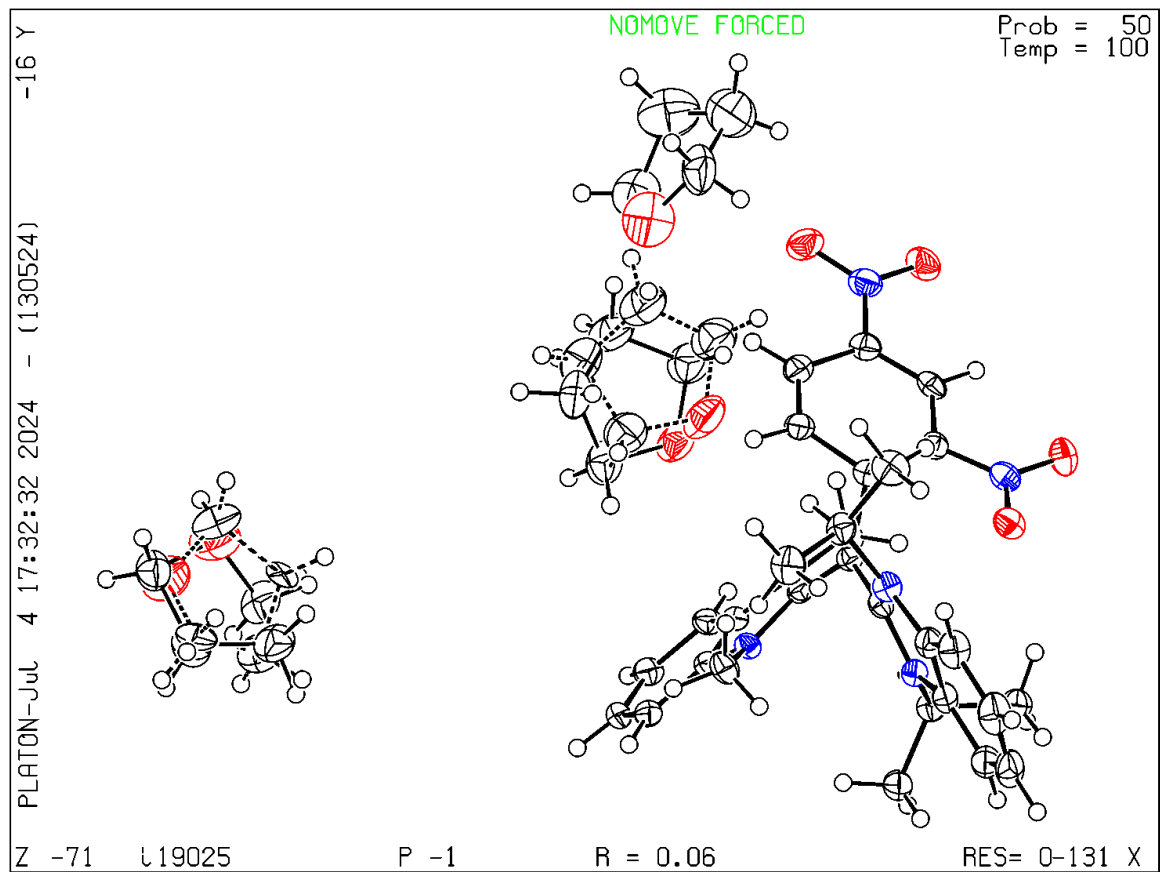

Supplement: Supplementary file 4 [file CCDC 2365154 (5a)_checkcif.pdf › CIF & CheckCIF Files/X-ray data/CCDC 2365154 (5a)_checkcif.pdf]
