# Supplementary material for: Isolated Carbon(I) Species Featuring a Carbone Cation Radical
Source: Research Square preprint supplement (doi:10.21203/rs.3.rs-4666553/v1), 2024-07-10

# checkCIF/PLATON report

You have not supplied any structure factors. As a result the full set of tests cannot be run.

THIS REPORT IS FOR GUIDANCE ONLY. IF USED AS PART OF A REVIEW PROCEDURE FOR PUBLICATION, IT SHOULD NOT REPLACE THE EXPERTISE OF AN EXPERIENCED CRYSTALLOGRAPHIC REFEREE.

No syntax errors found.      CIF dictionary      Interpreting this report

## Datablock: i17601

---

Bond precision:    C-C = 0.0093 Å

Wavelength=0.71073

Cell:                a=17.426(3)                b=17.980(3)                c=21.735(3)  
                      alpha=85.450(7)        beta=89.570(7)        gamma=88.868(8)  
Temperature:        100 K

|                        | Calculated                                   | Reported                                     |
|------------------------|----------------------------------------------|----------------------------------------------|
| Volume                 | 6787.1(19)                                   | 6787.5(17)                                   |
| Space group            | P -1                                         | P -1                                         |
| Hall group             | -P 1                                         | -P 1                                         |
| Moiety formula         | C46 H56 Au N8, 2(C2 F6 N O4 S2), 3(C H2 Cl2) | C46 H56 Au N8, 2(C2 F6 N O4 S2), 3(C H2 Cl2) |
| Sum formula            | C53 H62 Au Cl6 F12 N10 O8 S4                 | C53 H62 Au Cl6 F12 N10 O8 S4                 |
| Mr                     | 1733.04                                      | 1733.03                                      |
| Dx, g cm <sup>-3</sup> | 1.696                                        | 1.696                                        |
| Z                      | 4                                            | 4                                            |
| Mu (mm <sup>-1</sup> ) | 2.618                                        | 2.618                                        |
| F000                   | 3468.0                                       | 3468.0                                       |
| F000'                  | 3467.25                                      |                                              |
| h,k,lmax               | 22,23,28                                     | 22,23,27                                     |
| Nref                   | 30521                                        | 30276                                        |
| Tmin,Tmax              | 0.598,0.592                                  | 0.570,0.746                                  |
| Tmin'                  | 0.587                                        |                                              |

Correction method= # Reported T Limits: Tmin=0.570 Tmax=0.746  
AbsCorr = MULTI-SCAN

Data completeness= 0.992

Theta(max)= 27.293

R(reflections)= 0.0552( 26631)

wR2(reflections)= 0.1553( 30276)

S = 1.054

Npar= 1786

---

The following ALERTS were generated. Each ALERT has the format

**test-name\_ALERT\_alert-type\_alert-level.**

Click on the hyperlinks for more details of the test.

### Alert level C

|                   |                                                 |                                 |         |       |
|-------------------|-------------------------------------------------|---------------------------------|---------|-------|
| PLAT220_ALERT_2_C | Non-Solvent Resd 1 C                            | Ueq(max)/Ueq(min) Range         | 4.1     | Ratio |
| PLAT220_ALERT_2_C | Non-Solvent Resd 2 C                            | Ueq(max)/Ueq(min) Range         | 5.3     | Ratio |
| PLAT234_ALERT_4_C | Large Hirshfeld Difference F6A_6                | --C2A_6                         | 0.17    | Ang.  |
| PLAT242_ALERT_2_C | Low 'MainMol'                                   | Ueq as Compared to Neighbors of | S1_5    | Check |
| PLAT242_ALERT_2_C | Low 'MainMol'                                   | Ueq as Compared to Neighbors of | S2_5    | Check |
| PLAT244_ALERT_4_C | Low 'Solvent'                                   | Ueq as Compared to Neighbors of | C1_7    | Check |
| PLAT244_ALERT_4_C | Low 'Solvent'                                   | Ueq as Compared to Neighbors of | C1_10   | Check |
| PLAT260_ALERT_2_C | Large Average Ueq of Residue Including          | C11_7                           | 0.110   | Check |
| PLAT260_ALERT_2_C | Large Average Ueq of Residue Including          | C11_10                          | 0.106   | Check |
| PLAT260_ALERT_2_C | Large Average Ueq of Residue Including          | C11A_11                         | 0.110   | Check |
| PLAT260_ALERT_2_C | Large Average Ueq of Residue Including          | C11_12                          | 0.134   | Check |
| PLAT260_ALERT_2_C | Large Average Ueq of Residue Including          | C11B_11                         | 0.110   | Check |
| PLAT342_ALERT_3_C | Low Bond Precision on C-C Bonds                 | .....                           | 0.00926 | Ang.  |
| PLAT431_ALERT_2_C | Short Inter HL..A Contact F1_4                  | ..O4A_6                         | 2.88    | Ang.  |
|                   |                                                 | x,y,z =                         | 1_555   | Check |
| PLAT431_ALERT_2_C | Short Inter HL..A Contact F2_4                  | ..O4A_6                         | 2.80    | Ang.  |
|                   |                                                 | x,y,z =                         | 1_555   | Check |
| PLAT790_ALERT_4_C | Centre of Gravity not Within Unit Cell: Resd. # |                                 | 1       | Note  |
|                   | C46 H56 Au N8                                   |                                 |         |       |

### Alert level G

|                   |                                                  |         |              |       |
|-------------------|--------------------------------------------------|---------|--------------|-------|
| PLAT002_ALERT_2_G | Number of Distance or Angle Restraints on AtSite | 51      | Note         |       |
| PLAT003_ALERT_2_G | Number of Uiso or Uij Restrained non-H Atoms ... | 17      | Report       |       |
| PLAT012_ALERT_1_G | No _shelx_res_checksum Found in CIF .....        |         | Please Check |       |
| PLAT083_ALERT_2_G | SHELXL Second Parameter in WGHT Unusually Large  | 62.45   | Why ?        |       |
| PLAT152_ALERT_1_G | The Supplied and Calc. Volume s.u. Differ by ... | 2       | Units        |       |
| PLAT171_ALERT_4_G | The CIF-Embedded .res File Contains EADP Records | 20      | Report       |       |
| PLAT172_ALERT_4_G | The CIF-Embedded .res File Contains DFIX Records | 3       | Report       |       |
| PLAT175_ALERT_4_G | The CIF-Embedded .res File Contains SAME Records | 5       | Report       |       |
| PLAT178_ALERT_4_G | The CIF-Embedded .res File Contains SIMU Records | 5       | Report       |       |
| PLAT180_ALERT_4_G | Check Cell Rounding: # of Values Ending with 0 = | 3       | Note         |       |
| PLAT187_ALERT_4_G | The CIF-Embedded .res File Contains RIGU Records | 5       | Report       |       |
| PLAT242_ALERT_2_G | Low 'MainMol'                                    | C1_3    | Check        |       |
| PLAT242_ALERT_2_G | Low 'MainMol'                                    | C2_3    | Check        |       |
| PLAT242_ALERT_2_G | Low 'MainMol'                                    | C1_4    | Check        |       |
| PLAT242_ALERT_2_G | Low 'MainMol'                                    | C2_4    | Check        |       |
| PLAT242_ALERT_2_G | Low 'MainMol'                                    | C1_5    | Check        |       |
| PLAT242_ALERT_2_G | Low 'MainMol'                                    | C2_5    | Check        |       |
| PLAT302_ALERT_4_G | Anion/Solvent/Minor-Residue Disorder (Resd 6 )   | 100%    | Note         |       |
| PLAT302_ALERT_4_G | Anion/Solvent/Minor-Residue Disorder (Resd 7 )   | 100%    | Note         |       |
| PLAT302_ALERT_4_G | Anion/Solvent/Minor-Residue Disorder (Resd 9 )   | 100%    | Note         |       |
| PLAT302_ALERT_4_G | Anion/Solvent/Minor-Residue Disorder (Resd 12 )  | 100%    | Note         |       |
| PLAT302_ALERT_4_G | Anion/Solvent/Minor-Residue Disorder (Resd 14 )  | 100%    | Note         |       |
| PLAT302_ALERT_4_G | Anion/Solvent/Minor-Residue Disorder (Resd 15 )  | 100%    | Note         |       |
| PLAT304_ALERT_4_G | Non-Integer Number of Atoms in ..... Resd 6      | 9.14    | Check        |       |
| PLAT304_ALERT_4_G | Non-Integer Number of Atoms in ..... Resd 7      | 5.86    | Check        |       |
| PLAT304_ALERT_4_G | Non-Integer Number of Atoms in ..... Resd 9      | 3.26    | Check        |       |
| PLAT304_ALERT_4_G | Non-Integer Number of Atoms in ..... Resd 12     | 2.96    | Check        |       |
| PLAT304_ALERT_4_G | Non-Integer Number of Atoms in ..... Resd 14     | 1.75    | Check        |       |
| PLAT304_ALERT_4_G | Non-Integer Number of Atoms in ..... Resd 15     | 2.04    | Check        |       |
| PLAT432_ALERT_2_G | Short Inter X...Y Contact F6A_6                  | ..C36_2 | 2.95         | Ang.  |
|                   |                                                  | x,y,z = | 1_555        | Check |
| PLAT432_ALERT_2_G | Short Inter X...Y Contact O2_3                   | ..C25_2 | 2.88         | Ang.  |
|                   |                                                  | x,y,z = | 1_555        | Check |

|                                                                  |          |            |             |
|------------------------------------------------------------------|----------|------------|-------------|
| PLAT432_ALERT_2_G Short Inter X...Y Contact                      | O4_3     | ..C2_1     | 3.00 Ang.   |
|                                                                  |          | x,y,z =    | 1_555 Check |
| PLAT432_ALERT_2_G Short Inter X...Y Contact                      | O3B_6    | ..C33_2    | 3.00 Ang.   |
|                                                                  |          | x,y,z =    | 1_555 Check |
| PLAT434_ALERT_2_G Short Inter HL..HL Contact                     | Cl2_7    | ..Cl1B_8   | 2.79 Ang.   |
|                                                                  |          | x,y,z =    | 1_555 Check |
| PLAT434_ALERT_2_G Short Inter HL..HL Contact                     | Cl1_9    | ..Cl2_10   | 3.26 Ang.   |
|                                                                  |          | -1+x,y,z = | 1_455 Check |
| PLAT434_ALERT_2_G Short Inter HL..HL Contact                     | F2_4     | ..F5B_6    | 2.69 Ang.   |
|                                                                  |          | x,y,z =    | 1_555 Check |
| PLAT720_ALERT_4_G Number of Unusual/Non-Standard Labels          | .....    |            | 337 Note    |
| PLAT790_ALERT_4_G Centre of Gravity not Within Unit Cell: Resd.  | #        |            | 11 Note     |
|                                                                  | C H2 Cl2 |            |             |
| PLAT860_ALERT_3_G Number of Least-Squares Restraints             | .....    |            | 192 Note    |
| PLAT883_ALERT_1_G No Info/Value for _atom_sites_solution_primary | .        |            | Please Do ! |
| PLAT933_ALERT_2_G Number of OMIT Records in Embedded .res File   | ...      |            | 26 Note     |

---

0 **ALERT level A** = Most likely a serious problem - resolve or explain  
 0 **ALERT level B** = A potentially serious problem, consider carefully  
 16 **ALERT level C** = Check. Ensure it is not caused by an omission or oversight  
 41 **ALERT level G** = General information/check it is not something unexpected

3 ALERT type 1 CIF construction/syntax error, inconsistent or missing data  
 28 ALERT type 2 Indicator that the structure model may be wrong or deficient  
 2 ALERT type 3 Indicator that the structure quality may be low  
 24 ALERT type 4 Improvement, methodology, query or suggestion  
 0 ALERT type 5 Informative message, check

---

It is advisable to attempt to resolve as many as possible of the alerts in all categories. Often the minor alerts point to easily fixed oversights, errors and omissions in your CIF or refinement strategy, so attention to these fine details can be worthwhile. In order to resolve some of the more serious problems it may be necessary to carry out additional measurements or structure refinements. However, the purpose of your study may justify the reported deviations and the more serious of these should normally be commented upon in the discussion or experimental section of a paper or in the "special\_details" fields of the CIF. checkCIF was carefully designed to identify outliers and unusual parameters, but every test has its limitations and alerts that are not important in a particular case may appear. Conversely, the absence of alerts does not guarantee there are no aspects of the results needing attention. It is up to the individual to critically assess their own results and, if necessary, seek expert advice.

### Publication of your CIF in IUCr journals

A basic structural check has been run on your CIF. These basic checks will be run on all CIFs submitted for publication in IUCr journals (*Acta Crystallographica*, *Journal of Applied Crystallography*, *Journal of Synchrotron Radiation*); however, if you intend to submit to *Acta Crystallographica Section C* or *E* or *IUCrData*, you should make sure that full publication checks are run on the final version of your CIF prior to submission.

### Publication of your CIF in other journals

Please refer to the *Notes for Authors* of the relevant journal for any special instructions relating to CIF submission.

Datablock i17601 - ellipsoid plot

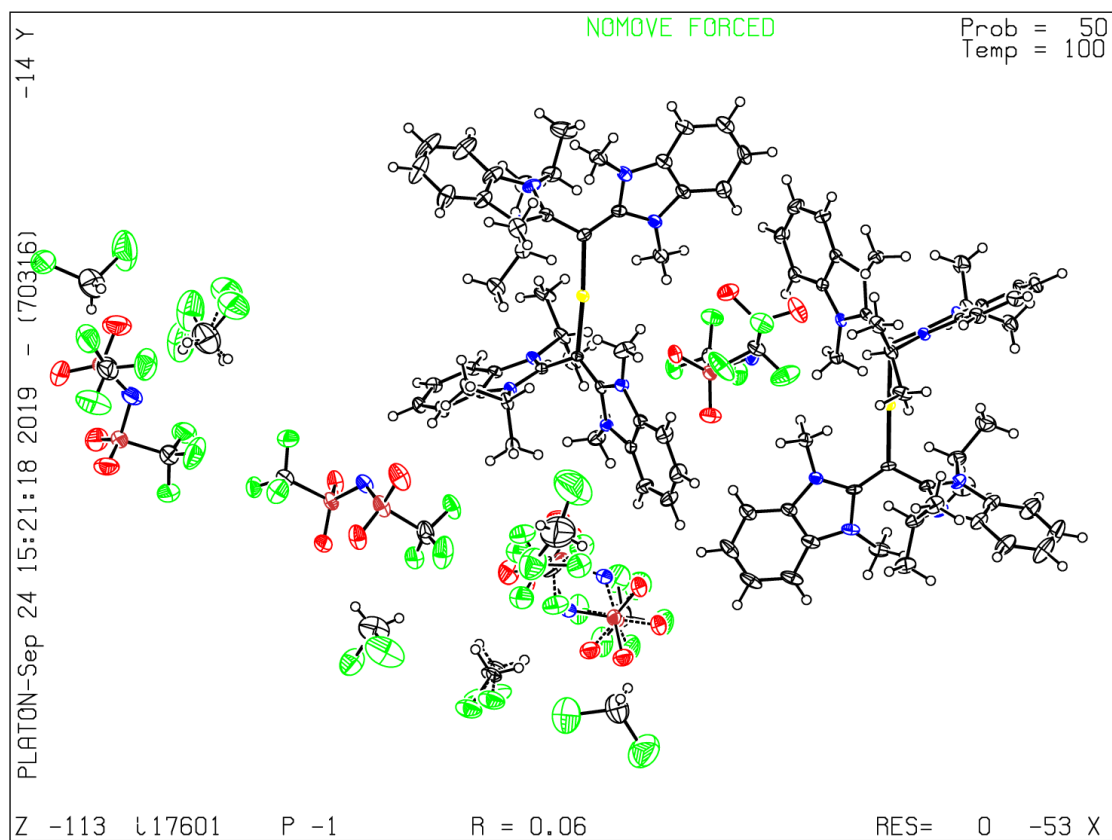

Supplement: Supplementary file 2 [file CCDC 2365152 ([2-Au].+)_checkcif.pdf › CIF & CheckCIF Files/X-ray data/CCDC 2365152 ([2-Au].+)_checkcif.pdf]
